# Supplementary material for: Improved Variant Calling Accuracy by Merging Replicates in Whole-Exome Sequencing Studies
Source: Hindawi journal article supplement (doi:10.1155/2014/319534), 2014-01-01

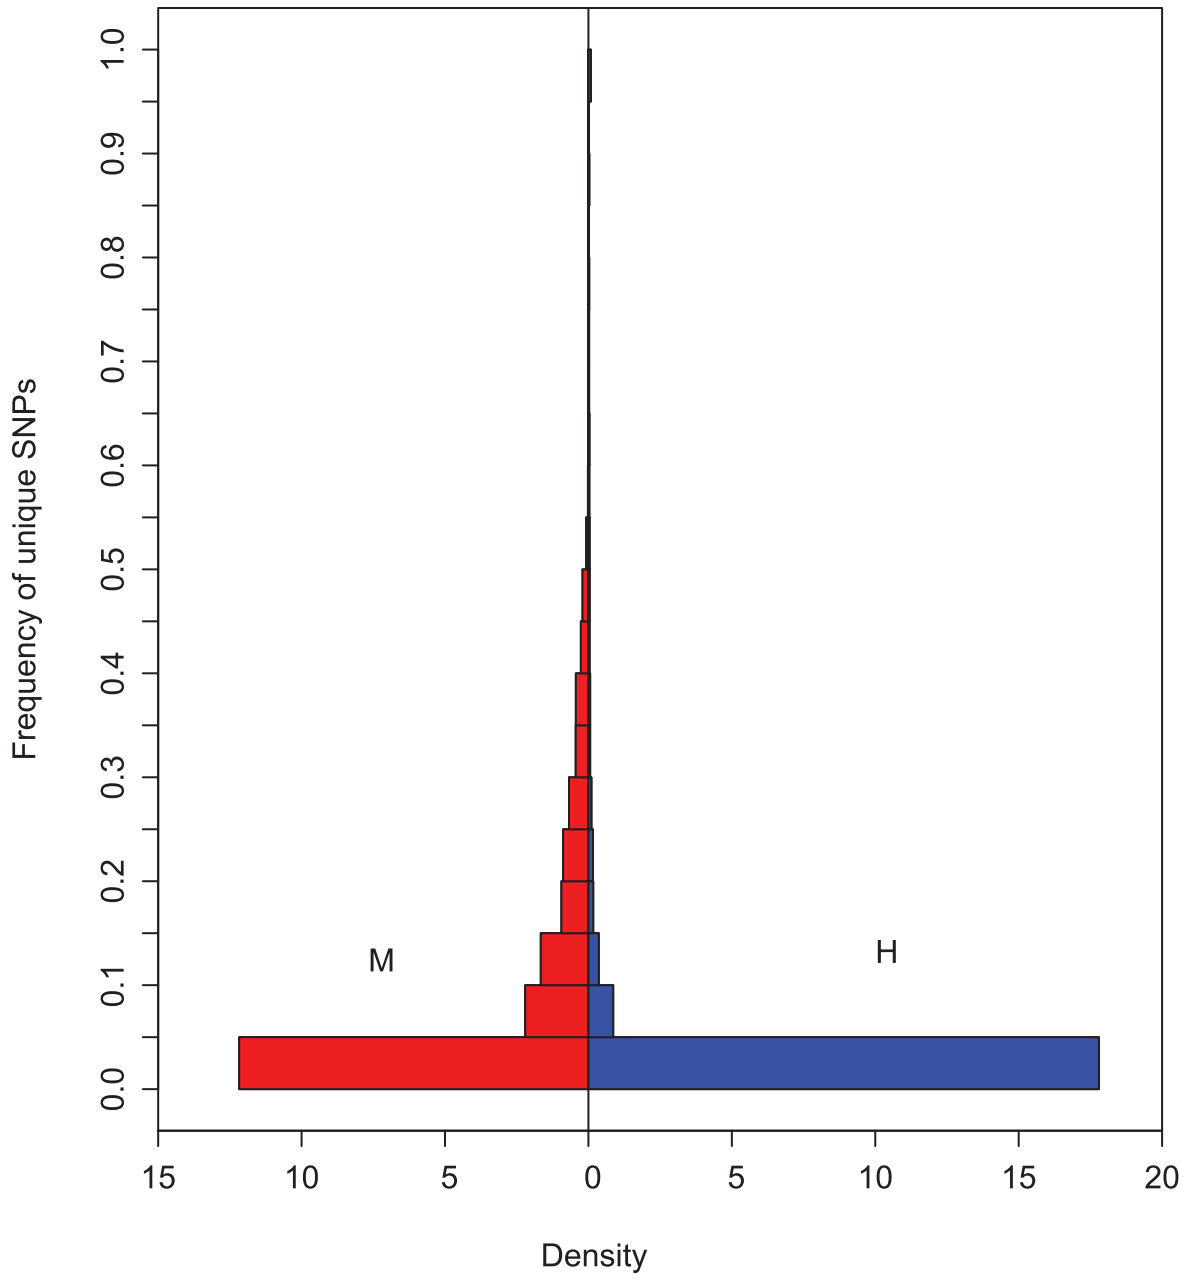

Supplement: f2 [file 319534.f2.pdf]
