# Supplementary material for: Improved Variant Calling Accuracy by Merging Replicates in Whole-Exome Sequencing Studies
Source: Biomed Res Int. 2014 Aug 4;2014:319534. doi: 10.1155/2014/319534 (PMC4137624; doi:10.1155/2014/319534)
Supplement: Supplementary file 1 — Table S1: Data production by 92 duplicated WES subjects. Table S2: Number of variants observed across the on-target and off-target regions. Figure S1: Alternative allele frequency distribution of SNPs uniquely called in H and M. [file 319534.f1.xlsx]

## Sheet: Table S1
Sample indix *	Mean depth	Base A(%)	Base C(%)	Base G(%)	Base T(%)	GC Bias MSE	Genome cover (%)	Insertion size medium	Insertion size mode	MQ <10 (%)	MQ >= 20 (%)	Mapped bases (e9)	Mapping rate (%)	Target mapping (%)	Total reads (e6)	Group
1	30.49	25.8	24.2	23.5	26.5	0.03	2.1	270	251	10.71	85.75	1.83	98.26	49.14	45.18	L
1	37.17	25.8	24.2	23.8	26.2	0.03	2.1	272	251	11.08	86.41	2.24	99.1	49.27	55.01	H
2	43.61	26.3	23.8	23.5	26.3	0.04	2.1	265	241	10.62	86.74	2.63	98.93	53.49	59.8	L
2	58.41	26.3	23.7	23.4	26.5	0.04	2.11	261	241	10.57	86.68	3.53	98.86	53.87	79.93	H
3	41.56	26.1	24	23.8	26.1	0.03	2.1	250	200	9.88	87.53	2.5	98.95	54.97	55.71	L
3	59.65	26.1	23.9	23.7	26.3	0.03	2.11	244	200	9.86	87.49	3.61	98.91	55.37	79.82	H
4	30.36	25.8	24.1	23.4	26.6	0.03	2.1	271	251	10.59	85.86	1.82	98.26	49.33	44.76	L
4	37.29	25.9	24.1	23.7	26.3	0.03	2.1	273	251	10.92	86.59	2.25	99.11	49.48	54.89	H
5	35.05	26.9	23.3	23.1	26.8	0.06	2.1	283	252	10.13	87.37	2.11	99.03	52.87	48.31	L
5	49.93	26.9	23.1	22.9	27	0.06	2.11	277	249	10	87.35	3.01	98.91	53.38	68.63	H
6	35.79	26.8	23.3	23	26.9	0.06	2.1	276	251	10.95	86.49	2.15	99.02	53.39	48.78	L
6	50.48	26.8	23.1	22.8	27.1	0.06	2.1	271	252	10.82	86.51	3.04	98.95	53.87	68.62	H
7	36.68	26.7	23.4	23.2	26.7	0.05	2.1	283	255	10.72	86.78	2.2	99.08	53.36	50.09	L
7	52.48	26.7	23.2	23	26.9	0.05	2.11	278	252	10.6	86.76	3.17	98.97	53.81	71.52	H
8	32.4	25.9	24	23.4	26.7	0.03	2.1	268	250	10.73	85.77	1.95	98.3	49.27	47.94	L
8	41.2	25.9	24.1	23.6	26.4	0.04	2.1	270	248	11.06	86.46	2.48	99.11	49.38	60.92	H
9	36.12	26.7	23.4	23.2	26.7	0.05	2.1	280	254	10.62	86.78	2.17	98.96	52.39	50.24	L
9	52.36	26.7	23.3	23	26.9	0.05	2.11	275	251	10.53	86.74	3.16	98.86	52.8	72.75	H
10	41.7	26.5	23.6	23.3	26.6	0.05	2.1	275	253	10.87	86.53	2.51	99	52.96	57.51	L
10	58.34	26.5	23.4	23.1	26.8	0.05	2.11	270	252	10.78	86.52	3.53	98.93	53.37	80.3	H
11	33.02	27.3	22.7	22.6	27.3	0.08	2.09	283	254	10.03	87.52	1.98	99.06	53.49	44.86	L
11	47.42	27.3	22.5	22.5	27.5	0.09	2.1	278	252	9.94	87.48	2.85	98.96	53.92	64.35	H
12	39.39	26.5	23.5	23.2	26.8	0.05	2.1	289	261	10.78	86.69	2.37	99.07	52.42	54.73	L
12	47.74	26.6	23.4	23.1	26.9	0.05	2.11	287	255	10.76	86.76	2.88	99.09	52.59	66.22	H
13	39.52	26.3	23.8	23.3	26.6	0.05	2.1	271	251	10.27	86.78	2.38	98.69	49.43	58.33	L
13	46.81	26.3	23.7	23.3	26.7	0.05	2.11	270	252	10.28	86.68	2.82	98.62	49.44	69.23	H
14	40.81	26.2	23.8	23.4	26.6	0.04	2.1	274	250	11.31	86.25	2.46	99.21	53.47	55.73	L
14	51.66	26.2	23.8	23.4	26.6	0.04	2.11	272	251	11.3	86.32	3.12	99.24	53.65	70.47	H
15	30.46	26.3	23.7	23.4	26.6	0.04	2.1	271	251	10.42	86.7	1.83	98.78	48.95	45.31	L
15	36.06	26.4	23.6	23.3	26.7	0.04	2.1	270	253	10.41	86.62	2.17	98.69	48.98	53.75	H
16	37.71	26.5	23.5	23.1	26.9	0.05	2.1	275	251	11.02	86.51	2.27	99.12	53.04	51.94	L
16	47.7	26.5	23.5	23.1	26.9	0.05	2.11	273	248	10.99	86.56	2.88	99.12	53.22	65.64	H
17	29.51	27	23	22.7	27.4	0.07	2.09	279	254	10.65	86.95	1.77	99.17	53.15	40.29	L
17	37.34	27.1	22.9	22.6	27.4	0.08	2.09	277	251	10.63	87.05	2.24	99.21	53.34	50.93	H
18	31.32	27.5	22.5	22.3	27.8	0.11	2.08	277	243	10.06	87.61	1.87	99.16	53.54	42.41	L
18	36.38	27.5	22.5	22.3	27.8	0.11	2.09	275	248	10.04	87.69	2.18	99.19	53.73	49.18	H
19	33.13	26.7	23.3	23	27.1	0.05	2.1	285	262	11.41	84.94	1.99	98.26	44.71	68.49	L
19	42.35	26.6	23.5	23	26.9	0.05	2.1	282	262	9.46	84.47	2.55	95.9	46.74	66.29	H
20	35.36	26.3	23.6	23.3	26.8	0.04	2.1	275	250	12.05	84.38	2.13	98.35	44.76	73.33	L
20	44.84	26.2	23.9	23.3	26.6	0.04	2.1	273	254	10.05	84.03	2.7	96.06	46.88	70.23	H
21	32.99	26.6	23.3	22.9	27.2	0.05	2.1	274	251	11.67	84.98	1.98	98.51	44.93	67.91	L
21	39.05	26.5	23.5	23	26.9	0.05	2.1	273	249	9.89	84.95	2.35	96.73	47.09	60.54	H
22	30.69	26.3	23.7	23.1	26.9	0.04	2.1	270	249	11.65	85.27	1.84	98.74	45.19	62.75	L
22	34.35	26.2	23.9	23.3	26.7	0.04	2.1	269	251	9.84	85.09	2.06	96.82	47.29	52.94	H
23	38.42	26.4	23.5	23	27.1	0.05	2.1	276	251	11.65	85.13	2.31	98.62	46.12	77.1	L
23	45.8	26.4	23.7	23.1	26.9	0.05	2.1	275	252	9.91	85.19	2.76	96.99	48.39	69.11	H
24	33.18	26.4	23.6	23	27	0.05	2.1	276	253	11.78	85.26	1.99	98.84	46.04	66.42	L
24	37.27	26.3	23.8	23.1	26.8	0.05	2.1	275	252	9.98	85.15	2.24	96.99	48.15	56.24	H
25	31.02	26.2	23.8	23.2	26.8	0.04	2.1	273	251	11.83	85.08	1.86	98.75	45.27	63.3	L
25	34.86	26.1	24	23.3	26.6	0.04	2.1	272	251	10.03	85.01	2.1	96.91	47.43	53.57	H
26	38.64	26.3	23.7	23.3	26.8	0.04	2.1	272	248	11.85	84.61	2.33	98.36	45.3	79.26	L
26	49.04	26.2	23.9	23.3	26.6	0.04	2.1	270	251	9.89	84.23	2.96	96.09	47.43	75.99	H
27	38.57	26.3	23.7	23.2	26.9	0.04	2.1	272	252	11.8	84.91	2.32	98.56	45.6	78.42	L
27	45.75	26.2	23.8	23.2	26.7	0.04	2.1	271	251	10.02	84.88	2.76	96.79	47.8	70.04	H
28	33.64	26.2	23.8	23.2	26.9	0.04	2.1	269	250	12.18	84.88	2.02	98.9	45.93	67.72	L
28	37.74	26.1	23.9	23.3	26.6	0.04	2.1	268	249	10.34	84.77	2.27	97.02	48.09	57.21	H
29	48.24	26.2	23.8	23.4	26.6	0.04	2.11	268	250	10.72	86.38	2.91	98.75	48.7	72.62	H
29	41.88	26.2	23.9	23.4	26.5	0.04	2.1	268	250	10.72	86.44	2.53	98.81	48.7	62.95	L
30	35.42	25.8	24.1	23.5	26.5	0.04	2.1	263	249	10.67	86.03	2.13	98.48	49.29	52.46	L
30	42.55	25.9	24.1	23.7	26.3	0.04	2.1	263	249	10.92	86.58	2.56	99.09	49.48	62.83	H
31	35.05	26.1	23.8	23.3	26.8	0.04	2.1	268	252	10.15	86.49	2.11	98.41	48.69	52.5	L
31	42.51	26.2	23.8	23.5	26.5	0.04	2.1	268	249	10.42	87.06	2.56	99.05	48.9	63.48	H
32	35.86	25.9	24	23.4	26.6	0.04	2.1	263	249	10.58	86.07	2.16	98.41	48.57	53.97	L
32	43.57	26	24	23.6	26.4	0.04	2.1	263	249	10.86	86.59	2.63	99.02	48.73	65.41	H
33	48.66	26.4	23.7	23.2	26.8	0.05	2.1	270	251	9.55	84.92	2.93	96.4	48.42	73.74	H
33	38.18	26.4	23.5	23.1	26.9	0.05	2.1	272	251	11.44	85.16	2.3	98.47	46.18	76.73	L
34	32.31	27.3	22.6	22.3	27.8	0.1	2.09	277	249	9.77	87.31	1.93	98.66	49.1	47.66	L
34	37.03	27.4	22.6	22.2	27.8	0.11	2.09	274	249	9.77	87.47	2.22	98.77	49.34	54.43	H
35	57.47	26	23.9	23.6	26.4	0.03	2.11	252	228	10.6	86.37	3.48	98.62	49.61	85.51	H
35	52.64	26	24	23.6	26.3	0.03	2.11	252	232	10.49	86.33	3.19	98.52	49.59	78.32	L
36	48.25	26.2	23.8	23.5	26.5	0.04	2.11	250	230	10.71	86.27	2.91	98.62	50.11	70.97	L
36	48.49	26.2	23.8	23.5	26.5	0.04	2.11	249	229	10.6	86.25	2.93	98.53	50.17	71.3	H
37	43.3	25.9	24.1	23.7	26.3	0.03	2.11	253	229	10.66	86.44	2.61	98.73	49.62	64.1	H
37	38.34	25.9	24.1	23.7	26.2	0.03	2.1	252	227	10.58	86.4	2.31	98.65	49.62	56.7	L
38	41.3	26.2	23.7	23.4	26.6	0.04	2.1	251	230	11.01	86.09	2.49	98.69	49.81	60.84	H
38	36.46	26.2	23.8	23.4	26.6	0.04	2.1	251	231	10.91	86.09	2.19	98.62	49.83	53.65	L
39	34.24	25.8	24.2	23.9	26.1	0.03	2.1	251	222	10.86	85.69	2.06	98.17	50.95	49.59	H
39	33.35	25.7	24.2	23.9	26.1	0.03	2.1	250	221	10.83	85.73	2	98.17	51.08	48.18	L
40	42.41	25.9	24.1	23.7	26.3	0.03	2.11	253	231	10.99	86	2.56	98.65	49.61	62.84	H
40	40.85	25.9	24.1	23.7	26.2	0.03	2.11	252	230	10.95	86.16	2.46	98.75	49.79	60.3	L
41	38.38	26.4	23.6	23.3	26.8	0.05	2.1	258	239	10.12	87.04	2.31	98.72	49.34	56.89	H
41	32.76	26.3	23.6	23.3	26.7	0.05	2.1	258	237	10.01	86.91	1.97	98.54	49.31	48.52	L
42	37.05	26.1	23.9	23.5	26.5	0.04	2.1	253	230	10.56	86.49	2.23	98.68	49.84	54.44	H
42	31.52	26.1	23.9	23.5	26.5	0.04	2.1	253	228	10.43	86.37	1.89	98.5	49.8	46.29	L
43	37.39	25.9	24.1	23.7	26.3	0.03	2.1	257	231	11	86.07	2.25	98.72	49.09	55.78	H
43	32.19	25.8	24.2	23.8	26.2	0.03	2.1	257	231	10.88	85.95	1.94	98.54	49.03	48.02	L
44	37.42	25.9	24.1	23.8	26.2	0.03	2.1	250	230	10.84	86.09	2.25	98.59	49.64	55.38	H
44	36.71	25.8	24.2	23.8	26.2	0.03	2.1	249	232	10.77	86.07	2.21	98.52	49.71	54.27	L
45	42.46	26	24	23.7	26.3	0.03	2.11	255	232	10.31	86.68	2.56	98.65	49.62	62.87	H
45	41.24	25.9	24.1	23.7	26.3	0.03	2.11	254	230	10.22	86.68	2.49	98.6	49.71	60.98	L
46	37.02	25.9	24.1	23.8	26.2	0.03	2.1	252	230	10.25	86.6	2.23	98.46	49.08	55.4	H
46	32.31	25.8	24.2	23.8	26.2	0.03	2.1	253	229	10.24	86.7	1.95	98.55	49.15	48.2	L
47	40.59	25.9	24.1	23.7	26.3	0.03	2.11	251	230	10.75	86.14	2.45	98.49	49.34	60.5	H
47	35.42	25.9	24.2	23.7	26.2	0.03	2.1	251	233	10.76	86.22	2.13	98.59	49.38	52.63	L
48	38.62	25.8	24.2	23.8	26.2	0.03	2.11	248	224	10.28	86.63	2.33	98.55	49.1	57.88	H
48	34.13	25.8	24.3	23.9	26.1	0.03	2.1	248	230	10.28	86.76	2.06	98.69	49.17	50.99	L
49	40.72	25.8	24.2	23.9	26.1	0.03	2.11	248	230	11.33	85.44	2.46	98.43	48.75	61.43	H
49	37.76	25.7	24.3	23.9	26.1	0.03	2.1	247	229	11.35	85.63	2.28	98.63	48.94	56.69	L
50	41.99	25.9	24.1	23.7	26.3	0.03	2.11	248	228	10.52	86.4	2.53	98.56	49.46	62.47	H
50	38.63	25.9	24.2	23.8	26.2	0.03	2.1	247	227	10.54	86.61	2.33	98.76	49.62	57.21	L
51	29.93	26.2	23.7	23.1	27	0.05	2.09	259	244	10.39	86.35	1.79	98.47	50.12	43.44	L
51	38.87	26.3	23.7	23.3	26.7	0.05	2.1	259	244	10.62	86.88	2.33	99.05	50.29	56.39	H
52	47.44	26.1	23.9	23.6	26.4	0.03	2.12	260	238	10.83	86.44	2.88	98.86	48.72	71.81	L
52	56.99	26.3	23.7	23.4	26.6	0.04	2.12	257	237	10.49	85.92	3.46	98.12	48.6	86.76	H
53	39.45	25.9	24.1	23.8	26.2	0.03	2.11	249	210	10.9	86.37	2.39	98.88	48.92	59.53	L
53	59.77	26.2	23.8	23.5	26.5	0.04	2.12	244	208	10.52	86.09	3.63	98.3	49.03	90.49	H
54	29.56	25.8	24.1	23.5	26.6	0.03	2.1	268	246	10.34	86.09	1.77	98.24	49.66	43.37	L
54	41.35	25.9	24.1	23.7	26.3	0.03	2.1	269	240	10.61	86.82	2.49	99.04	49.91	60.58	H
55	33.5	26	23.9	23.2	26.8	0.04	2.1	261	233	10.52	85.98	2.01	98.26	50.17	48.7	L
55	44.71	26.1	23.9	23.4	26.6	0.04	2.11	262	236	10.8	86.72	2.7	99.08	50.41	64.85	H
56	49.65	26.2	23.8	23.5	26.5	0.04	2.12	243	200	10.48	86.71	3.01	98.78	49.21	74.67	L
56	60.03	26.4	23.6	23.3	26.7	0.05	2.12	239	200	10.13	86.26	3.65	98.06	49.09	90.79	H
57	40.63	25.9	24.1	23.8	26.2	0.03	2.11	266	242	10.63	86.68	2.46	98.91	48.74	61.36	L
57	55.94	26.2	23.8	23.5	26.5	0.04	2.12	261	242	10.26	86.17	3.4	98.13	48.7	84.92	H
58	41.41	26.3	23.7	23.4	26.6	0.04	2.1	284	258	10.74	86.92	2.5	99.16	54.15	55.98	L
58	50.82	26.4	23.7	23.3	26.6	0.04	2.11	282	251	10.7	86.94	3.07	99.12	54.29	68.63	H
59	33.58	26.4	23.6	23.3	26.8	0.04	2.1	279	252	10.47	87.15	2.02	99.19	54.77	44.78	L
59	42.53	26.5	23.5	23.2	26.8	0.05	2.1	277	251	10.42	87.17	2.56	99.13	54.94	56.71	H
60	35.33	26.5	23.4	23	27.1	0.06	2.1	282	251	10.27	86.89	2.12	98.76	53.91	47.87	L
60	45.63	26.6	23.4	23.1	26.9	0.06	2.1	280	252	10.42	87.25	2.75	99.21	54.15	61.71	H
61	30.47	26.6	23.3	23	27.1	0.05	2.1	282	259	11.89	84.72	1.83	98.51	44.65	63.11	L
61	38.4	26.5	23.5	23.1	26.9	0.05	2.1	280	259	10.03	84.59	2.31	96.54	46.83	59.86	H
62	31.66	25.7	24.3	24	26	0.02	2.1	287	259	11.28	84.5	1.9	97.58	46.81	49.72	L
62	35.69	25.8	24.2	23.9	26.1	0.02	2.1	285	257	11.29	84.7	2.15	97.71	47.05	55.83	H
63	32.83	26.5	23.4	23	27	0.05	2.1	280	259	11.55	85.29	1.97	98.66	44.95	67.58	L
63	39.61	26.4	23.7	23.1	26.8	0.05	2.1	279	257	9.71	85.04	2.39	96.68	47.07	61.51	H
64	31.73	26.3	23.7	23.1	26.9	0.04	2.1	278	254	12.3	84.42	1.91	98.58	44.54	65.8	L
64	39.93	26.3	23.8	23.1	26.7	0.05	2.1	276	254	10.34	84.2	2.4	96.46	46.64	62.48	H
65	31.28	26.5	23.4	23.1	27	0.05	2.1	276	252	11.72	84.97	1.88	98.51	44.69	64.82	L
65	38.88	26.4	23.6	23.1	26.8	0.05	2.1	275	257	9.92	84.83	2.34	96.6	46.89	60.64	H
66	30.77	25.9	24.1	23.8	26.2	0.03	2.1	284	248	10.79	85.76	1.85	98.26	47.14	47.74	L
66	35.36	26	24	23.7	26.3	0.03	2.1	281	249	10.77	85.97	2.13	98.39	47.42	54.63	H
67	32.55	26.3	23.7	23.1	26.9	0.04	2.1	273	253	12.08	84.68	1.96	98.63	44.56	67.52	L
67	40.4	26.2	23.8	23.2	26.7	0.04	2.1	271	255	10.16	84.51	2.43	96.6	46.68	63.2	H
68	34.65	26.4	23.6	23.1	26.9	0.05	2.1	275	251	11.69	85.16	2.08	98.72	46.08	69.61	L
68	43.3	26.3	23.7	23.2	26.7	0.05	2.1	274	251	9.9	85.21	2.61	97.02	48.42	65.34	H
69	52.95	26.4	23.6	23.2	26.8	0.05	2.11	275	252	11.02	86.2	3.2	98.89	48.89	79.05	L
69	60.86	26.4	23.6	23.2	26.8	0.05	2.11	273	253	11	86.38	3.68	99	49.12	90.52	H
70	36.63	26.4	23.5	23	27	0.05	2.1	274	253	11.99	84.99	2.2	98.77	45.8	74.09	L
70	38.97	26.3	23.7	23.2	26.8	0.05	2.1	273	252	10.19	84.93	2.34	96.99	48.08	59.18	H
71	29.96	26.6	23.3	22.8	27.3	0.06	2.09	281	261	11.77	85.04	1.79	98.66	45.42	60.67	L
71	37.24	26.5	23.4	22.9	27.1	0.06	2.09	279	260	9.89	84.93	2.24	96.71	47.58	56.89	H
72	33.22	26.3	23.7	23.2	26.8	0.04	2.1	271	250	11.77	85.12	2	98.68	45.05	68.43	L
72	39.87	26.2	23.9	23.3	26.6	0.04	2.1	270	251	9.99	84.99	2.4	96.86	47.28	61.82	H
73	34.83	26.2	23.7	23.3	26.7	0.04	2.1	270	249	11.95	84.78	2.09	98.6	45.63	70.88	L
73	43.42	26.2	23.8	23.4	26.6	0.04	2.1	269	250	10.14	84.7	2.62	96.74	47.91	66.43	H
74	40.23	26.1	23.8	23.2	26.8	0.04	2.1	275	253	10.4	86.45	2.42	98.5	48.8	60.05	L
74	65.76	26.3	23.7	23.3	26.7	0.04	2.11	272	252	10.53	86.93	3.98	99.01	49.19	97.87	H
75	31.19	26.3	23.7	23.1	26.9	0.04	2.1	271	251	11.37	85.42	1.87	98.62	45.92	62.78	L
75	38.75	26.2	23.8	23.2	26.7	0.04	2.1	269	252	9.56	85.19	2.33	96.61	48.11	58.85	H
76	34.13	26	23.9	23.3	26.7	0.04	2.1	262	247	10.41	86.29	2.05	98.43	48.43	51.47	L
76	56.7	26.1	23.9	23.5	26.5	0.04	2.11	261	248	10.67	86.83	3.43	99.05	48.75	85.4	H
77	36.5	26.5	23.5	23.1	26.9	0.05	2.1	253	227	9.76	86.6	2.2	98.03	50.03	53.63	H
77	35.95	26.5	23.4	23.2	26.9	0.05	2.1	254	228	9.87	86.68	2.16	98.18	49.98	52.8	L
78	33.46	26.8	23.1	22.9	27.1	0.07	2.09	259	230	9.65	86.9	2.01	98.21	49.84	49.11	L
78	36.65	26.9	23.1	22.9	27.2	0.07	2.1	258	229	9.76	86.96	2.2	98.34	49.89	53.76	H
79	32.23	27	23	22.7	27.4	0.08	2.09	257	231	9.84	86.92	1.93	98.38	49.94	47.15	L
79	34.59	27	22.9	22.7	27.4	0.08	2.09	257	232	9.93	86.94	2.08	98.45	49.94	50.63	H
80	45.69	25.8	24.2	23.8	26.2	0.03	2.11	248	224	10.63	86.29	2.76	98.58	50.11	67.2	L
80	46.27	25.9	24.1	23.8	26.2	0.03	2.11	249	229	10.73	86.32	2.79	98.67	50.02	68.15	H
81	35	26	24	23.6	26.4	0.03	2.1	248	228	10.07	86.98	2.11	98.7	50.63	50.74	L
81	36.11	26	23.9	23.6	26.4	0.03	2.1	249	232	10.17	86.98	2.17	98.76	50.55	52.4	H
82	39.05	25.9	24.1	23.7	26.2	0.03	2.1	254	228	10.11	87.14	2.35	98.85	49.98	57.32	L
82	44.3	25.9	24.1	23.7	26.3	0.03	2.11	254	232	10.12	86.99	2.67	98.72	49.91	65.21	H
83	41.1	25.8	24.2	23.8	26.1	0.03	2.11	258	230	10.27	86.86	2.48	98.78	49.34	61.16	L
83	45.93	25.9	24.1	23.8	26.2	0.03	2.11	258	231	10.29	86.69	2.77	98.65	49.24	68.53	H
84	34.16	25.9	24.1	23.7	26.3	0.03	2.1	251	232	10.46	86.32	2.05	98.46	50	50.08	L
84	36.15	26	24	23.7	26.3	0.03	2.1	253	232	10.62	86.41	2.18	98.66	49.94	53.04	H
85	34.05	25.8	24.2	23.8	26.1	0.03	2.1	252	231	10.1	86.88	2.05	98.61	49.66	50.29	L
85	38.23	25.8	24.2	23.8	26.2	0.03	2.1	252	231	10.18	86.89	2.3	98.67	49.66	56.53	H
86	30.64	25.8	24.2	23.8	26.2	0.03	2.1	256	230	10.45	86.5	1.84	98.62	49.75	45.04	L
86	34.51	25.9	24.1	23.7	26.3	0.03	2.1	256	232	10.5	86.54	2.08	98.68	49.77	50.77	H
87	34.81	26	23.9	23.6	26.4	0.04	2.1	249	222	10.63	86.3	2.1	98.59	49.5	51.61	L
87	38.41	26.1	23.8	23.6	26.5	0.04	2.1	249	221	10.7	86.29	2.31	98.62	49.49	57.03	H
88	39.29	25.8	24.2	23.8	26.2	0.03	2.11	250	230	10.4	86.54	2.37	98.56	49.25	58.7	L
88	41.27	25.9	24.1	23.7	26.3	0.03	2.11	250	232	10.39	86.47	2.49	98.48	49.14	61.83	H
89	35.71	25.9	24.1	23.7	26.2	0.03	2.1	254	228	10.34	86.73	2.15	98.7	49.35	53.08	L
89	38.08	26	24	23.7	26.3	0.03	2.11	254	230	10.34	86.63	2.3	98.59	49.25	56.78	H
90	31.98	25.8	24.2	23.8	26.2	0.03	2.1	251	229	10.17	86.87	1.92	98.68	49.14	47.69	L
90	37.93	25.8	24.1	23.8	26.2	0.03	2.1	250	230	10.12	86.71	2.29	98.49	49.06	56.81	H
91	31.12	25.8	24.2	23.8	26.2	0.03	2.1	245	221	10.41	86.69	1.87	98.72	49.96	45.67	L
91	37.08	25.9	24.1	23.7	26.3	0.03	2.1	244	219	10.38	86.49	2.23	98.52	49.88	54.64	H
92	35.39	25.8	24.3	23.9	26.1	0.04	2.1	248	223	10.28	86.81	2.13	98.74	49.08	52.99	L
92	41.34	25.8	24.1	23.8	26.2	0.03	2.11	247	227	10.25	86.58	2.5	98.51	48.97	62.16	H
* Each sample has two replicates, indexing from 1 to 92

## Sheet: Table S2
Sample index	# SNPs on-target	# SNPs off-target	# unique SNPs	Calling strategies *
1	46645	102680	24554	Merge
1	44377	75767	1310	High
1	42880	64470	1139	Low
2	47409	105395	18742	Merge
2	46259	85611	1445	High
2	44916	74509	1076	Low
3	47100	103724	20247	Merge
3	46087	82940	1424	High
3	44681	69129	1051	Low
4	46671	102238	24542	Merge
4	44383	75432	1353	High
4	42728	64094	1154	Low
5	46843	104215	20371	Merge
5	45406	83238	1369	High
5	43310	67669	1018	Low
6	46861	101263	19712	Merge
6	45347	81017	1371	High
6	43272	66790	1022	Low
7	47386	105772	19983	Merge
7	46144	85285	1438	High
7	44256	69745	1028	Low
8	46742	105847	23438	Merge
8	44895	80911	1625	High
8	43246	67677	1401	Low
9	47507	105102	19646	Merge
9	46146	85171	1453	High
9	44007	69076	1113	Low
10	47491	106496	18889	Merge
10	46335	86826	1395	High
10	44766	73609	1127	Low
11	46182	99324	20639	Merge
11	44452	78485	1317	High
11	41941	62536	975	Low
12	46597	106924	21887	Merge
12	44976	82310	1253	High
12	43982	73605	1004	Low
13	47046	111624	23182	Merge
13	45248	85806	1474	High
13	44270	77507	1163	Low
14	47274	104838	19842	Merge
14	45851	83236	1290	High
14	44803	73548	1001	Low
15	46240	100342	24455	Merge
15	43694	73144	1320	High
15	42343	64208	1015	Low
16	46689	102181	20890	Merge
16	45032	79675	1280	High
16	43713	69379	1001	Low
17	45694	91538	23086	Merge
17	43083	67167	1140	High
17	41076	56326	878	Low
18	45348	90020	23945	Merge
18	41973	64264	1087	High
18	40543	57409	837	Low
19	46451	111719	25410	Merge
19	44353	82711	1576	High
19	42768	73706	1476	Low
20	47027	112543	24175	Merge
20	45239	84600	1654	High
20	43949	77215	1548	Low
21	46370	106712	25114	Merge
21	43766	76962	1524	High
21	42601	71565	1419	Low
22	46277	100302	25501	Merge
22	43288	69143	1393	High
22	42220	66233	1302	Low
23	46553	111922	23587	Merge
23	44605	83800	1580	High
23	43637	78789	1549	Low
24	46147	105887	25711	Merge
24	43309	74474	1366	High
24	42449	71427	1417	Low
25	46273	102514	25885	Merge
25	43349	70986	1380	High
25	42404	67781	1327	Low
26	47148	115140	23582	Merge
26	45546	87878	1641	High
26	44406	81064	1620	Low
27	46629	112012	23656	Merge
27	44763	83573	1599	High
27	43926	79278	1504	Low
28	46522	103765	24644	Merge
28	43926	73391	1405	High
28	43112	70991	1405	Low
29	47924	113284	22899	Merge
29	46279	87247	1462	High
29	45607	80459	1167	Low
30	46786	104757	22426	Merge
30	44872	80158	1469	High
30	43645	70695	1169	Low
31	47385	107907	23053	Merge
31	45398	82546	1465	High
31	44002	72184	1251	Low
32	47090	106643	22722	Merge
32	45234	81704	1480	High
32	44057	71787	1240	Low
33	46837	113243	23251	Merge
33	45158	86690	1690	High
33	43963	79135	1528	Low
34	46325	100346	27590	Merge
34	42697	70350	1430	High
34	41428	63752	1190	Low
35	51610	127730	25537	Merge
35	50604	99278	5556	High
35	50179	94388	5342	Low
36	47142	109683	22467	Merge
36	45391	81836	1390	High
36	45214	81318	1257	Low
37	46900	104750	22817	Merge
37	45111	78728	1426	High
37	44371	72715	1183	Low
38	46862	101479	22986	Merge
38	44764	75451	1322	High
38	43917	69179	1098	Low
39	46376	94858	25452	Merge
39	43324	64540	1234	High
39	43170	62874	1010	Low
40	47198	105706	23261	Merge
40	45292	77675	1389	High
40	44957	75037	1115	Low
41	46405	100719	23730	Merge
41	44086	74758	1364	High
41	42798	65982	1010	Low
42	46634	97235	23812	Merge
42	44170	71048	1287	High
42	42925	62920	1035	Low
43	47011	99821	24221	Merge
43	44745	72911	1367	High
43	43562	65150	1028	Low
44	46747	99310	23308	Merge
44	44418	70916	1311	High
44	44269	69163	1115	Low
45	46673	105415	23186	Merge
45	44737	77291	1404	High
45	44414	75147	1121	Low
46	46987	99096	23751	Merge
46	44657	72299	1360	High
46	43752	65170	971	Low
47	46405	100864	22856	Merge
47	44372	75043	1344	High
47	43455	68274	1059	Low
48	47027	99624	23082	Merge
48	44867	73132	1308	High
48	44098	67237	1075	Low
49	47018	102329	22948	Merge
49	44954	75348	1358	High
49	44495	71303	1140	Low
50	46831	102597	22750	Merge
50	44795	75952	1316	High
50	44313	71745	1105	Low
51	45812	97388	22321	Merge
51	43674	74036	1320	High
51	41453	61030	1046	Low
52	47907	119472	23354	Merge
52	46612	93280	1802	High
52	45956	85835	1453	Low
53	48124	116130	23024	Merge
53	46988	93003	1836	High
53	45298	75643	1220	Low
54	47071	105012	23119	Merge
54	45389	81414	1441	High
54	42963	63236	1107	Low
55	46848	105334	22930	Merge
55	45172	81501	1408	High
55	43249	66410	1070	Low
56	47830	118464	24401	Merge
56	46412	91374	1805	High
56	45790	84072	1354	Low
57	48292	118510	23055	Merge
57	47022	94252	1792	High
57	45670	80227	1379	Low
58	47245	105051	20471	Merge
58	45775	82258	1249	High
58	44866	73651	1034	Low
59	46902	96351	21214	Merge
59	45006	73371	1168	High
59	43545	62913	930	Low
60	46396	98986	20639	Merge
60	44614	76976	1245	High
60	43079	65171	1012	Low
61	46804	108128	26112	Merge
61	44314	78531	1532	High
61	42632	69425	1391	Low
62	46684	108049	29033	Merge
62	44006	75096	1677	High
62	42993	68475	1495	Low
63	46689	109760	25720	Merge
63	44400	79483	1581	High
63	43064	72984	1473	Low
64	46731	107361	25298	Merge
64	44333	78301	1513	High
64	42741	69726	1359	Low
65	46428	108076	25651	Merge
65	44069	78545	1532	High
65	42455	70904	1450	Low
66	46612	105892	28320	Merge
66	44003	73997	1406	High
66	42886	66407	1179	Low
67	46476	107237	24622	Merge
67	44227	78467	1516	High
67	42816	71363	1450	Low
68	46630	110048	23718	Merge
68	44577	82553	1550	High
68	43304	75405	1474	Low
69	47260	124090	23271	Merge
69	45984	97351	1706	High
69	45375	91481	1420	Low
70	46469	108947	24304	Merge
70	43961	77525	1495	High
70	43552	77869	1567	Low
71	46231	104868	26035	Merge
71	43487	75173	1467	High
71	41635	66866	1363	Low
72	46714	107905	24974	Merge
72	44471	78341	1530	High
72	43307	72568	1462	Low
73	46687	109782	23718	Merge
73	44784	82116	1565	High
73	43676	75399	1432	Low
74	47276	121151	20299	Merge
74	46415	101383	1774	High
74	44413	78906	1280	Low
75	46261	103688	24976	Merge
75	43845	75129	1449	High
75	42252	67448	1370	Low
76	47279	111715	19625	Merge
76	46219	93063	1602	High
76	43556	69257	1107	Low
77	46508	99424	24721	Merge
77	43739	69989	1975	High
77	43557	69187	1901	Low
78	46145	98491	25155	Merge
78	43093	70054	1392	High
78	42247	65077	1020	Low
79	46110	94357	25453	Merge
79	42591	65622	1200	High
79	41852	61837	931	Low
80	47217	108472	22607	Merge
80	45482	80652	1436	High
80	45334	79248	1166	Low
81	46350	96838	23269	Merge
81	43856	68940	1185	High
81	43549	66538	985	Low
82	46829	106706	23241	Merge
82	45006	80214	1418	High
82	44258	73979	1115	Low
83	47662	110436	23739	Merge
83	45936	82954	1436	High
83	45304	77086	1162	Low
84	46347	98064	23384	Merge
84	43895	70256	1295	High
84	43469	66796	1011	Low
85	47405	100957	23643	Merge
85	45158	73994	1322	High
85	44277	67747	1091	Low
86	46526	95939	24319	Merge
86	43968	68232	1217	High
86	42951	62199	1044	Low
87	46773	99764	23671	Merge
87	44457	72361	1223	High
87	43741	67429	1088	Low
88	46882	102909	22717	Merge
88	44885	75648	1399	High
88	44564	72728	1160	Low
89	46718	100790	23530	Merge
89	44463	72767	1362	High
89	44025	69218	1167	Low
90	46586	97662	23406	Merge
90	44273	71902	1381	High
90	43114	63830	1045	Low
91	46553	94464	22816	Merge
91	44311	69539	1335	High
91	42946	61175	985	Low
92	47519	102103	23217	Merge
92	45517	76218	1385	High
92	44549	68793	1143	Low
* Calling strategies are shown in Figure 1
